# Supplementary material
Source: MDPI journal article supplement (https://www.mdpi.com/2077-0472/14/2/250)
Supplement: s1 [file s1]

# Supplementary

**Table S1.** Significant ( $P < 0.05$ ) differences in SOC were observed between the soil layers within the same land type. The standard errors are marked.

|       | CCunfert | CCfert | GRunfert | GRfert | UAL | PA |
|-------|----------|--------|----------|--------|-----|----|
| 0–15  | A        | A      | A        | A      | A   | A  |
| 15–25 | A        | A      | A        | B      | B   | B  |

Notes. CCunfert—non-fertilised crop cultivation; CCfert—fertilised crop cultivation; GRunfert—non-fertilised cut grassland cultivation; GRfert—fertilised cut grassland cultivation; UAL—uncultivated abandoned land; PA—pine afforestation field. Capital letters indicate differences between soil layers within the same land type.

**Table S2.** Significant ( $P < 0.05$ ) differences of HS between soil layers within the same land type.

|              | Depth, cm | CCunfert | CCfert | GRunfert | GRfert | UAL | PA |
|--------------|-----------|----------|--------|----------|--------|-----|----|
| <b>HA1</b>   | 0–15      | A        | A      | A        | A      | A   | A  |
|              | 15–25     | A        | A      | A        | A      | A   | B  |
| <b>FAa1</b>  | 0–15      | A        | A      | A        | A      | A   | A  |
|              | 15–25     | B        | B      | A        | A      | A   | A  |
| <b>FA1</b>   | 0–15      | A        | A      | A        | A      | A   | A  |
|              | 15–25     | A        | A      | A        | B      | A   | B  |
| <b>HA2</b>   | 0–15      | A        | A      | A        | A      | A   | A  |
|              | 15–25     | B        | B      | B        | A      | A   | A  |
| <b>FA2</b>   | 0–15      | A        | A      | A        | B      | A   | A  |
|              | 15–25     | B        | B      | A        | A      | A   | B  |
| <b>HA3</b>   | 0–15      | A        | A      | A        | A      | A   | A  |
|              | 15–25     | A        | B      | B        | A      | B   | A  |
| <b>FA3</b>   | 0–15      | A        | A      | A        | A      | A   | A  |
|              | 15–25     | B        | A      | A        | A      | B   | B  |
| <b>Humin</b> | 0–15      | B        | A      | B        | A      | A   | A  |
|              | 15–25     | A        | A      | A        | B      | A   | A  |

Notes. CCunfert—non-fertilised crop cultivation; CCfert—fertilised crop cultivation; GRunfert—non-fertilised cut grassland cultivation; GRfert—fertilised cut grassland cultivation; UAL—uncultivated abandoned land; PA—pine afforestation field. HA1—labile humic acids; FAa1—labile fulvic acids; FA1—labile fulvic acids; HA2—calcium-bound humic acids; FA2—calcium-bound fulvic acids; HA3—clay mineral-bound humic acids; FA3—clay mineral-bound fulvic acids. Capital letters indicate differences between soil layers within the same land type.
